# Supplementary material for: Aurones as Antidiabetic Agents and Their Prebiotic Activities
Source: MDPI journal article supplement (doi:10.3390/futurepharmacol3030040), 2023-09-07
Supplement: s1 [file s1]

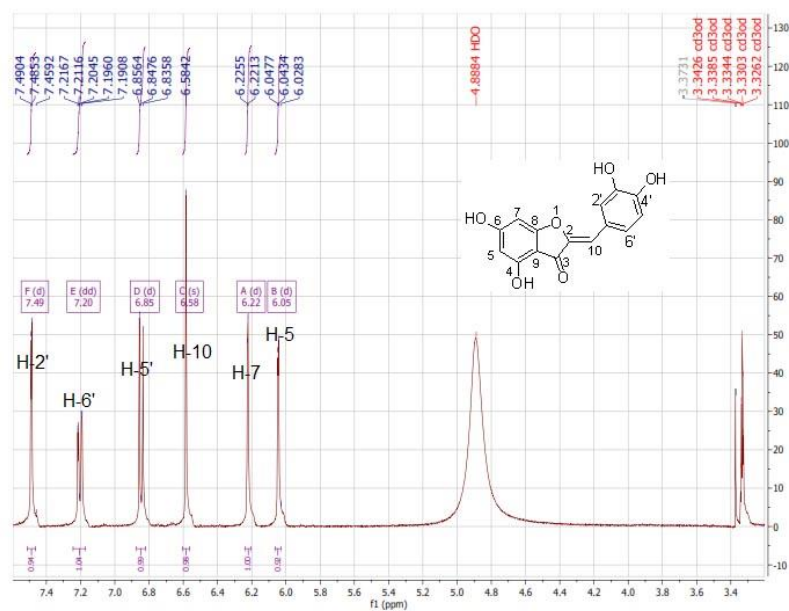

Figure S1. <sup>1</sup>H-NMR spectrum (CD<sub>3</sub>OD, 400 MHz) of aureusidin (1)

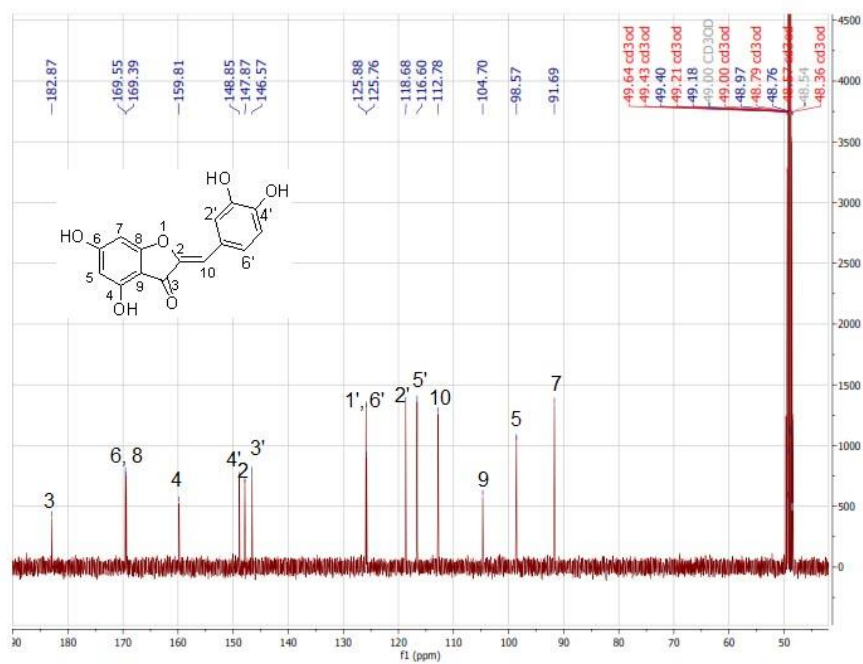

Figure S2. <sup>13</sup>C-NMR spectrum (CD<sub>3</sub>OD, 101 MHz) of aureusidin (1)

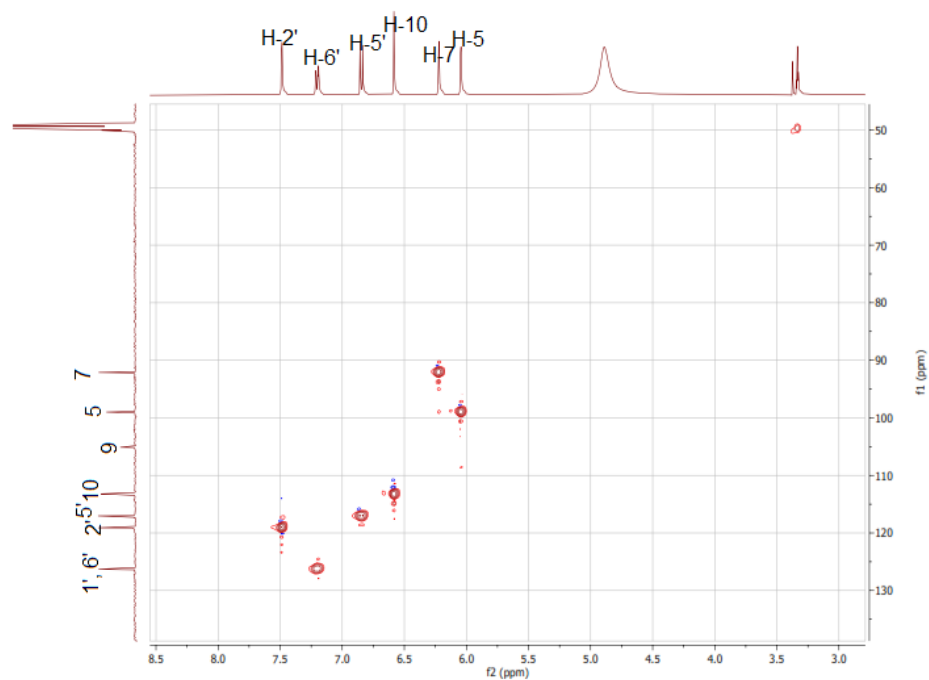

Figure S3. HSQC spectrum of aureusidin (**1**)

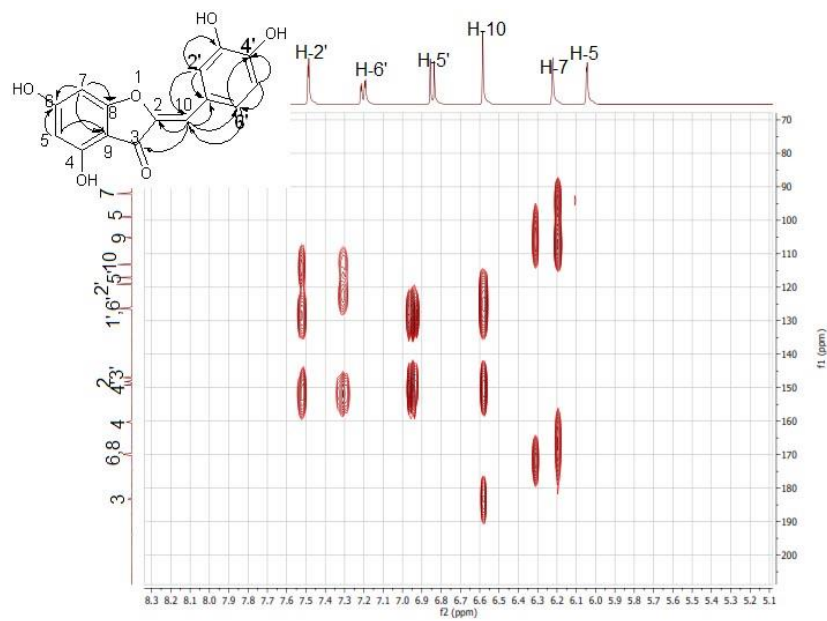

Figure S4. HMBC spectrum of aureusidin (**1**)

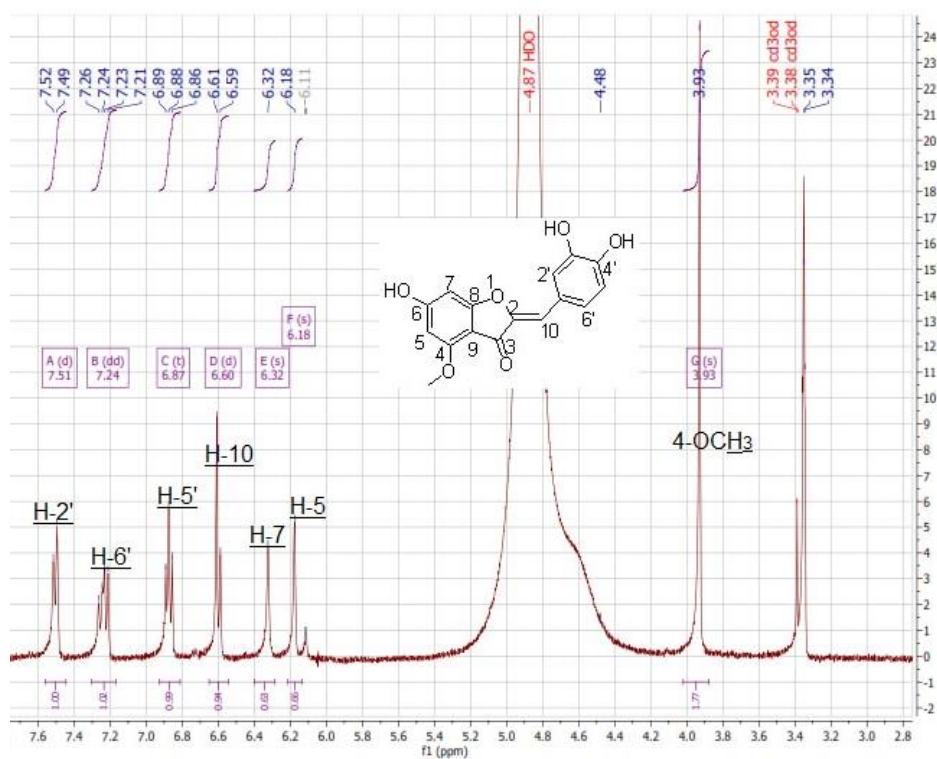

Figure S5. <sup>1</sup>H-NMR spectrum (CD<sub>3</sub>OD, 400 MHz) of aureusidin-4-methyl ether (**2**)

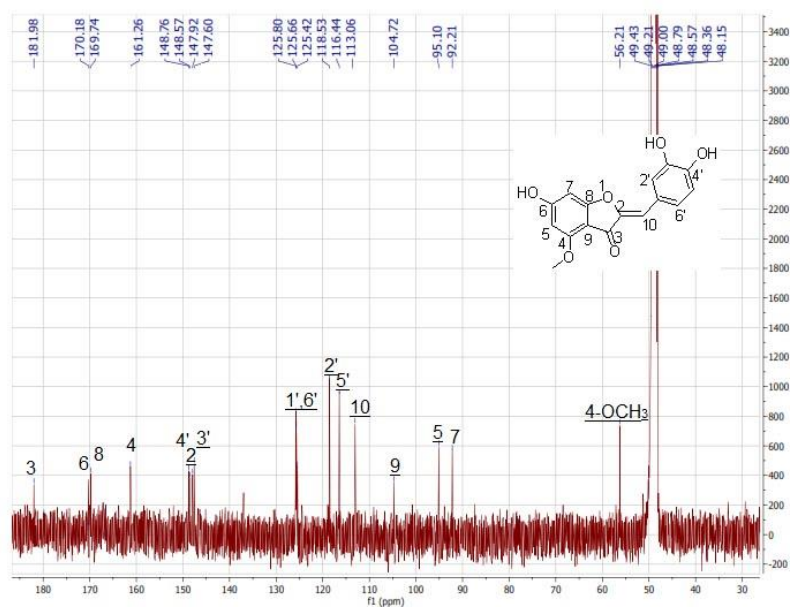

Figure S6. <sup>13</sup>C-NMR spectrum (CD<sub>3</sub>OD, 101 MHz) of aureusidin-4-methyl ether (**2**)

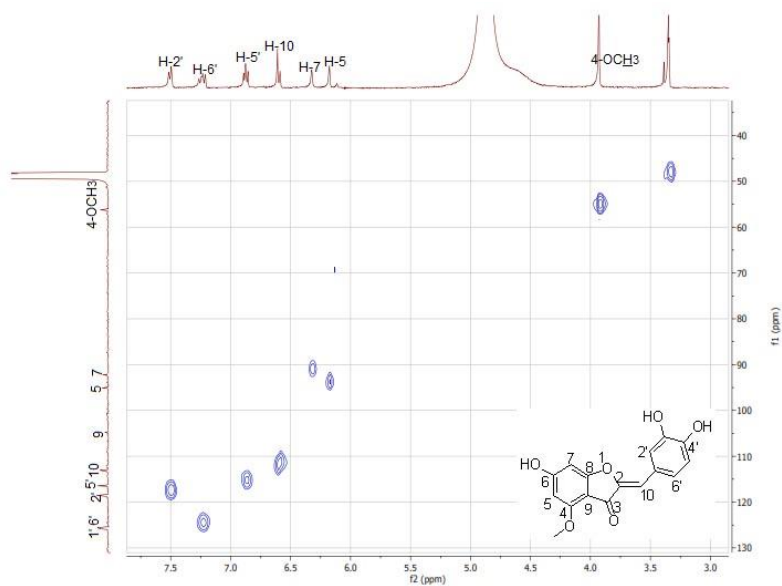

Figure S7. HSQC spectrum of aureusidin-4-methyl ether (2)

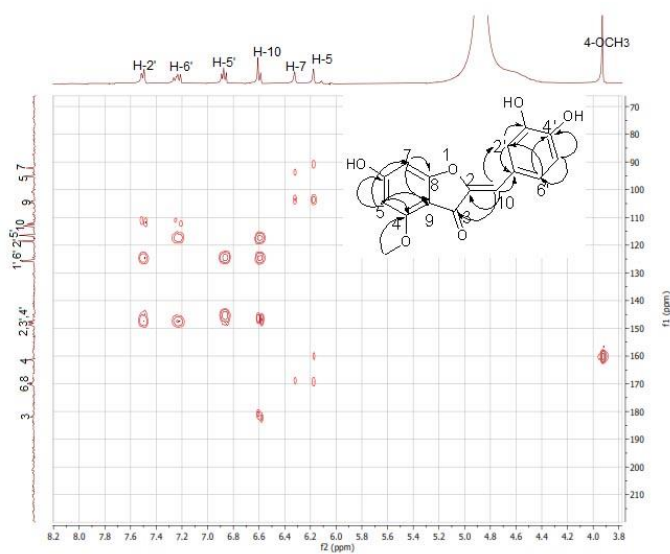

Figure S8. HMBC spectrum of aureusidin-4-methyl ether (2)

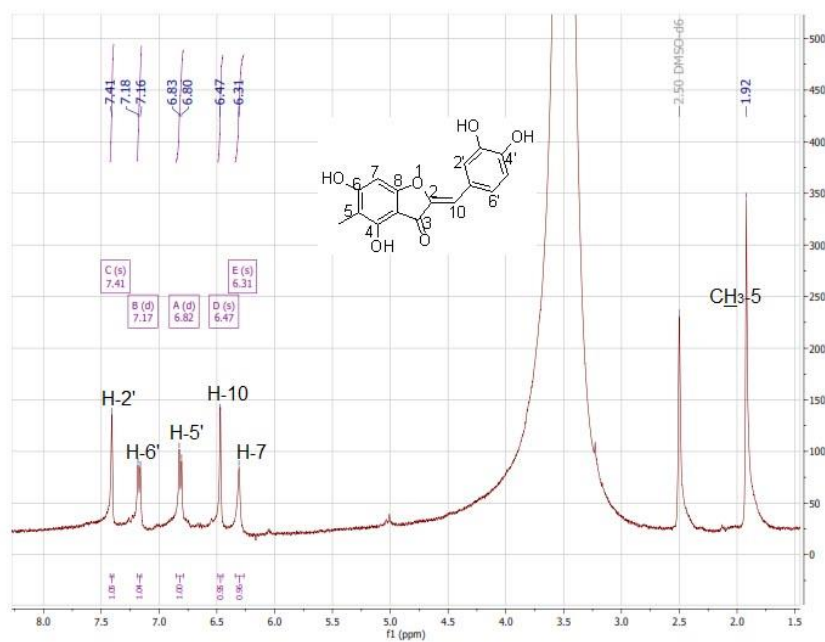

Figure S9. <sup>1</sup>H-NMR spectrum (DMSO-*d*<sub>6</sub>, 400 MHz) of 5-methyl aureusidin (3)

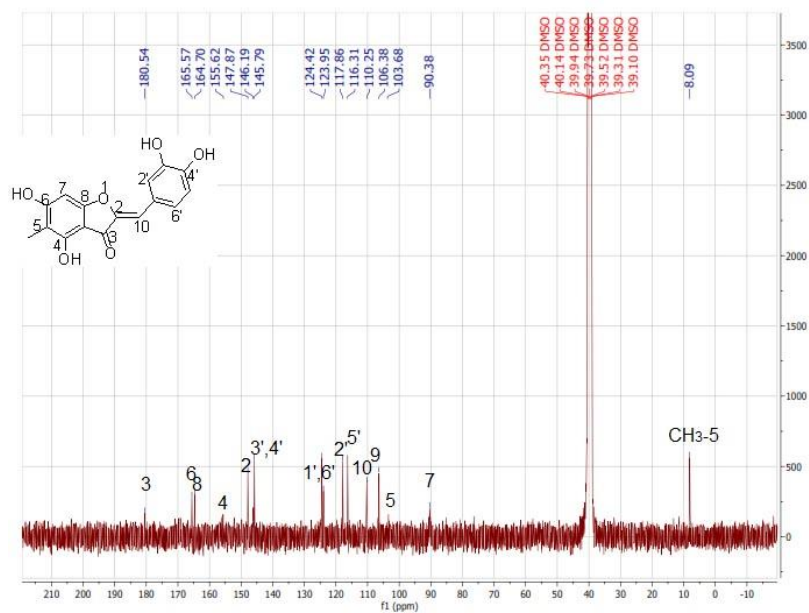

Figure S10. <sup>13</sup>C-NMR spectrum (DMSO-*d*<sub>6</sub>, 101 MHz) of 5-methyl aureusidin (3)

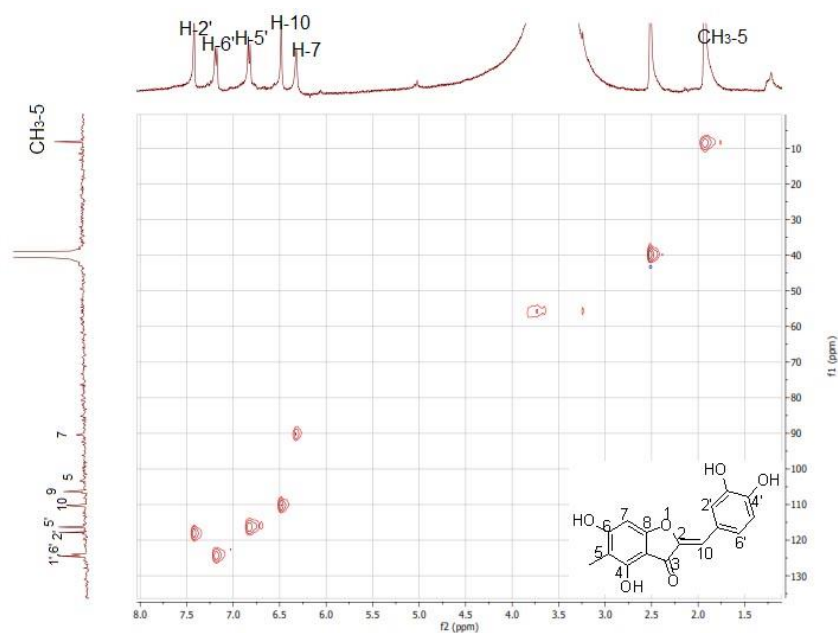

Figure S11. HSQC spectrum of 5-methyl aureusidin (**3**)

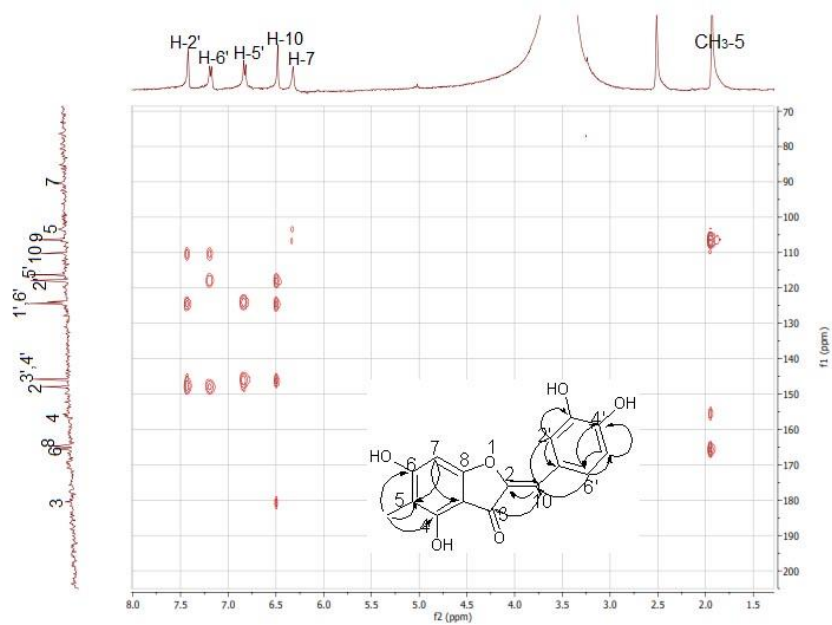

Figure S12. HMBC spectrum of 5-methyl aureusidin (**3**)

**Table S1:** Receptor interactions and binding energies of the tested compounds, and acarbose inside the binding pocket of  $\alpha$ -amylase.

| Tested compound | S Score<br>Kcal/mole | RMSD_Refine | Amino acid bond   | Distance<br>Å |
|-----------------|----------------------|-------------|-------------------|---------------|
| <b>Acarbose</b> | -22.09               | 1.82        | Lys200/H-donor    | 2.17          |
|                 |                      |             | Lys200/H-donor    | 2.24          |
|                 |                      |             | His201/H-acceptor | 3.44          |
|                 |                      |             | Gly306/H-acceptor | 1.85          |
|                 |                      |             | Asp197/H-acceptor | 2.4           |
|                 |                      |             | Asp300/H-acceptor | 2.27          |
| <b>1</b>        | -17.55               | 2.00        | Asp197/H-acceptor | 2.04          |
| <b>3</b>        | -16.42               | 1.84        | Asp197/H-acceptor | 2.15          |
| <b>2</b>        | -15.21               | 1.46        | Asp300/H-acceptor | 2.74          |

**Table S2:** Receptor interactions and binding energies of the tested compounds, and acarbose inside the binding pocket of  $\alpha$ -glucosidase.

| Tested compound | S Score<br>Kcal/mole | RMSD_Refine | Amino acid bond     | Distance<br>Å |
|-----------------|----------------------|-------------|---------------------|---------------|
| <b>Acarbose</b> | -30.42               | 1.05        | Asn258/H-acceptor   | 1.85          |
|                 |                      |             | Asp326/H-acceptor   | 1.87          |
|                 |                      |             | Asp326/H-acceptor   | 2.43          |
|                 |                      |             | Asp326/H-acceptor   | 1.83          |
|                 |                      |             | Arg411/H-donor      | 2.02          |
|                 |                      |             | Arg411/H-donor      | 2.33          |
|                 |                      |             | Ser 384/ H-acceptor | 2.14          |
|                 |                      |             | His325/ H-acceptor  | 3.2           |
| <b>3</b>        | -21.61               | 2.10        | Tyr63/ arene-arene  | 3.93          |
|                 |                      |             | Arg411/H-donor      | 2.19          |
|                 |                      |             | Asp382/H-acceptor   | 2.08          |
| <b>1</b>        | -20.64               | 2.54        | Tyr63/ arene-arene  | 3.85          |
|                 |                      |             | Arg411/H-donor      | 2.24          |
|                 |                      |             | Asp382/H-acceptor   | 1.93          |
| <b>2</b>        | -20.47               | 1.36        | Tyr63/ arene-arene  | 1.39          |



**Table S3:** Receptor interactions and binding energies of the tested compounds, and CP-91149 inside the binding pocket of glycogen phosphorylase.

| Tested compound | S Score Kcal/mole | RMSD_Refine | Amino acid bond      | Distance Å |
|-----------------|-------------------|-------------|----------------------|------------|
| <b>CP-91149</b> | -17.77            | 1.74        | Lys191/ arene-cation | 3.92       |
|                 |                   |             | Lys191/ arene-cation | 3.74       |
|                 |                   |             | Arg193/ arene-cation | 4.69       |
|                 |                   |             | Arg60/ H-donor       | 2.11       |
| <b>2</b>        | -13.42            | 1.41        | Arg193/ arene-cation | 2.09       |
|                 |                   |             | Arg60/arene-cation   | 3.11       |
|                 |                   |             | Lys191/ H-donor      | 3.55       |
| <b>1</b>        | -13.20            | 0.80        | Arg60/ arene-cation  | 3.27       |
| <b>3</b>        | -12.84            | 1.72        | Arg60/arene-cation   | 3.92       |
|                 |                   |             | Arg193/ arene-cation | 3.96       |
